# Supplementary material for: Topological relationships between perivascular spaces and progression of white matter hyperintensities: A pilot study in a sample of the Lothian Birth Cohort 1936
Source: Front Neurol. 2022 Aug 24;13:889884. doi: 10.3389/fneur.2022.889884 (PMC9449650; doi:10.3389/fneur.2022.889884)
Supplement: Supplementary file 3 [file Table_1.XLSX]

## Sheet: PVSburden&WMHvol
Subject no.	W1_CSO_PVS_vol_mm3	W1_CSO_PVS_sizeMean	PVS_close2WMH_W1	WMH1_vol_mm3	PVS_close2WMH_W2	WMH2_vol_mm3	PVS_close2WMH_W3	WMH3_vol_mm3									W1_CSO_PVS_vol_mm3	WMH1_vol_mm3									W1_PVS_CSO_sizeMean	WMH1vol_mm3
1	4913	12.2301	23	1422	30	6284	45	10430									4913	1422									12.2301	1422
2	9503	14.4789	31	14508	33	22804	63	28352									9503	14508									14.4789	14508
3	7468	12.2164	0	3644	7	8118	30	14274									7468	3644									12.2164	3644
4	10228	17.5185	0	218	1	3406	5	5610									10228	218									17.5185	218
5	6104	13.887	10	1854	12	3084	24	5420									6104	1854									13.887	1854
6	14254	17.4438	18	9472	25	19458	43	27450									14254	9472									17.4438	9472
7	6841	12.2677	35	5854	38	18318	73	25426									6841	5854									12.2677	5854
8	4754	9.14277	8	3772	10	9274	20	14264									4754	3772									9.14277	3772
9	7301	14.3888	2	4630	2	3090	4	4098									7301	4630									14.3888	4630
10	7635	13.6537	24	15818	27	14344	40	20530									7635	15818									13.6537	15818
11	2030	10.1375	21	8102	22	11382	43	26614									2030	8102									10.1375	8102
12	11266	17.6586	19	6564	21	5188	45	8000									11266	6564									17.6586	6564
13	8244	13.2907	39	12720	41	12974	67	19566									8244	12720									13.2907	12720
14	14575	24.8867	4	3768	11	12784	25	19312									14575	3768									24.8867	3768
15	3467	9.71389	2	920	1	4366	3	7960									3467	920									9.71389	920
16	8634	18.8821	47	28648	41	33660	74	47038									8634	28648									18.8821	28648
17	7619	13.158	16	15948	18	15298	13	18946									7619	15948									13.158	15948
18	4851	10.8611	28	7550	49	11272	56	15060									4851	7550									10.8611	7550
19	4710	12.7989	34	4642	49	11352	50	13290									4710	4642									12.7989	4642
20	5064	14.5535	8	4128	16	6992	14	7104									5064	4128									14.5535	4128
21	5848	14.4331	0	1118	0	3166	2	5144									5848	1118									14.4331	1118
22	10336	17.3869	50	12598	55	16656	65	33206									10336	12598									17.3869	12598
23	8319	17.0457	22	8434	30	15072	30	24366									8319	8434									17.0457	8434
24	9434	15.3775	5	4990	5	4646	10	9184									9434	4990									15.3775	4990
26	11913	19.0398	24	8096	29	11396	37	20854									11913	8096									19.0398	8096
27	8261	12.5565	2	6574	2	6558	1	8756									8261	6574									12.5565	6574
28	5486	11.0963	2	2938	5	10406	7	11496									5486	2938									11.0963	2938
29	7528	15.0528	4	2354	4	1850	19	3114									7528	2354									15.0528	2354

## Sheet: PVSdensity_analysis
Subject no.	Density_close_w1	Density_notclose_w1		Density_close_w2	Density_notclose_w2		Density_close_w3	Density_notclose_w3
1	0.138566	0.0361476		0.180738	0.0361476		0.271107	0.138566
2	0.163218	0.0421208		0.173748	0.0210604		0.331701	0.0947718
3	0	0.00548137		0.0383696	0.0109627		0.164441	0.0328882
4	0	0		0.00573105	0		0.0286553	0.0114621
5	0.0884189	0		0.106103	0.00884189		0.212205	0.0530513
6	0.0864171	0.0288057		0.120024	0.0240048		0.206441	0.0384076
7	0.21542	0.110788		0.233885	0.160027		0.449305	0.295434
8	0.0533095	0.0399821		0.0666369	0.0333185		0.133274	0.0932917
9	0.0158757	0		0.0158757	0		0.0317513	0.0238135
10	0.179654	0.0299424		0.202111	0.0224568		0.299424	0.127255
11	0.254468	0.0969403		0.266586	0.109058		0.521054	0.448349
12	0.144373	0.0455913		0.15957	0.0607884		0.341935	0.212759
13	0.223529	0.0401206		0.234992	0.0401206		0.384011	0.154751
14	0.0307879	0.015394		0.0846668	0.015394		0.192425	0.0769699
15	0.0154628	0		0.00773138	0		0.0231941	0
16	0.346385	0.132658		0.302166	0.117918		0.545373	0.302166
17	0.113859	0.0142323		0.128091	0.0213485		0.0925102	0.00711617
18	0.176434	0.0756144		0.308759	0.189036		0.352867	0.226843
19	0.287327	0.126762		0.414089	0.160565		0.42254	0.21127
20	0.0701785	0.0175446		0.140357	0.0263169		0.122812	0.00877231
21	0	0		0	0.0267742		0.0178495	0.0178495
22	0.305876	0.0856452		0.336463	0.134585		0.397639	0.140703
23	0.168255	0.0458877		0.229438	0.0611836		0.229438	0.122367
24	0.0312357	0		0.0312357	0		0.0624715	0.0124943
25	0	0		0	0		0.007359	0
26	0.152839	0.00636829		0.18468	0.0127366		0.235627	0.0382097
27	0.011104	0		0.011104	0		0.00555201	0
28	0.0167367	0.00836834		0.0418417	0		0.0585784	0
29	0.0279211	0.00698027		0.0279211	0.0139605		0.132625	0.0139605
T-test	1.25861e-06			2.44319e-07			1.13266e-08
mean	0.114402	0.034875		0.139756	0.0450554		0.216351	0.100121
SD	0.103346	0.0406445		0.116593	0.0560016		0.162689	0.112806

## Sheet: PVSclosenesschange&WMHvol
Subject no.	Numberof_CSOPVS_increased_closeoraround_1to2	WMH2_vol_mm3	Numberof_CSOPVS_increased_closeoraround_2to3	WMH3_vol_mm3
1	16	6284	30	10430
2	30	22804	31	28352
3	0	8118	5	14274
4	0	3406	1	5610
5	8	3084	12	5420
6	18	19458	21	27450
7	31	18318	35	25426
8	2	9274	8	14264
9	0	3090	2	4098
10	21	14344	21	20530
11	15	11382	23	26614
12	13	5188	20	8000
13	23	12974	27	19566
14	4	12784	9	19312
15	1	4366	1	7960
16	35	33660	41	47038
17	10	15298	9	18946
18	18	11272	36	15060
19	27	11352	36	13290
20	8	6992	9	7104
21	0	3166	1	5144
22	43	16656	55	33206
23	17	15072	17	24366
24	4	4646	5	9184
26	15	11396	21	20854
27	1	6558	1	8756
28	2	10406	4	11496
29	2	1850	4	3114

## Sheet: Data Dictionary
Variable name	Meaning
Subject no.	Study participant number in this study
W1_CSO_PVS_vol_mm3	Volume of PVS in the centrum semiovale (CSO) measured at the scanning wave 1, in cubic millimeters
W1_CSO_PVS_sizeMean	Mean size (considering length and width) of the PVS in the centrum semiovale at the scanning wave 1 (in voxels)
PVS_close2WMH_W1	Number of CSO PVS close to white matter hyperintensity deep clusters counted at the scanning wave 1
WMH1_vol_mm3	Volume of the white matter hyperintensities at the scanning wave 1, in cubic millimeters
PVS_close2WMH_W2	Number of CSO PVS close to white matter hyperintensity deep clusters counted at the scanning wave 2
WMH2_vol_mm3	Volume of the white matter hyperintensities at the scanning wave 2, in cubic millimeters
PVS_close2WMH_W3	Number of CSO PVS close to white matter hyperintensity deep clusters counted at the scanning wave 3
WMH3_vol_mm3	Volume of the white matter hyperintensities at the scanning wave 3, in cubic millimeters
Numberof_CSOPVS_increased_closeoraround_1to2	Number of PVS in the CSO considered that increased close or around WMH from the first to the second scan
Numberof_CSOPVS_increased_closeoraround_2to3	Number of PVS in the CSO considered that increased close or around WMH from the second to the third scan
