# Supplementary material for: Topological relationships between perivascular spaces and progression of white matter hyperintensities: A pilot study in a sample of the Lothian Birth Cohort 1936
Source: Front Neurol. 2022 Aug 24;13:889884. doi: 10.3389/fneur.2022.889884 (PMC9449650; doi:10.3389/fneur.2022.889884)
Supplement: Supplementary file 4 [file Table_2.XLSX]

## Sheet: Volumetric data
Study_ID	RCSO_PVS_CC_vol	LCSO_PVS_CC_vol	CSO_PVS_CC_vol	PVS_RCSO_sizeMean	PVS_LCSO_sizeMean	PVS_CSO_sizeMean	PVS_LCSO_lengthMean	PVS_RCSO_lengthMean	PVS_CSO_lengthMean	PVS_RCSO_widthMean	PVS_LCSO_widthMean	PVS_CSO_widthMean
Subject_1	2545	2368	4913	13.3947	11.0654	12.2301	5.67018	6.09543	5.88281	2.67559	2.59328	2.63444
Subject_2	5038	4465	9503	15.5494	13.4084	14.4789	5.59853	6.07225	5.83539	3.07329	2.85943	2.96636
Subject_3	3959	3509	7468	12.0334	12.3993	12.2164	5.99878	5.9302	5.96449	2.80086	2.83289	2.81687
Subject_4	5290	4938	10228	17.4013	17.6357	17.5185	6.62287	6.7286	6.67574	3.03907	3.12134	3.08021
Subject_5	3020	3084	6104	13.3628	14.4112	13.887	5.93239	5.93334	5.93286	3.03362	3.17387	3.10375
Subject_6	7445	6809	14254	18.5199	16.3678	17.4438	6.49041	6.74906	6.61973	3.23689	3.15918	3.19803
Subject_7	3482	3359	6841	12.708	11.8275	12.2677	5.78209	6.11019	5.94614	2.69882	2.68359	2.6912
Subject_8	2360	2394	4754	9.18288	9.10266	9.14277	5.22614	5.20997	5.21806	2.58513	2.52011	2.55262
Subject_9	3615	3686	7301	14.8156	13.9621	14.3888	5.84184	6.13974	5.99079	3.12937	3.06038	3.09487
Subject_10	4017	3618	7635	13.7568	13.5506	13.6537	5.93056	5.91643	5.92349	2.96935	3.00574	2.98755
Subject_11	1029	1001	2030	10.8316	9.4434	10.1375	4.74671	5.15823	4.95247	2.5845	2.57585	2.58017
Subject_12	5771	5495	11266	17.6483	17.6688	17.6586	6.8133	6.64636	6.72983	3.19756	3.22783	3.2127
Subject_13	3795	4449	8244	13.4574	13.1239	13.2907	5.81178	6.10235	5.95707	2.7964	2.8234	2.8099
Subject_14	7504	7071	14575	25.9654	23.8081	24.8867	7.29843	7.2224	7.26042	3.56848	3.47631	3.5224
Subject_15	1945	1522	3467	9.97436	9.45342	9.71389	5.14398	5.20652	5.17525	2.64907	2.57097	2.61002
Subject_16	4397	4237	8634	17.588	20.1762	18.8821	6.34378	6.2589	6.30134	3.09811	3.32375	3.21093
Subject_17	3658	3961	7619	12.6574	13.6586	13.158	5.81031	5.48848	5.64939	2.86277	3.06223	2.9625
Subject_18	2278	2573	4851	10.0796	11.6425	10.8611	5.42269	4.99867	5.21068	2.59574	2.71075	2.65324
Subject_19	2291	2419	4710	12.4511	13.1467	12.7989	5.906	5.41847	5.66223	2.79912	2.85229	2.82571
Subject_20	2470	2594	5064	14.6154	14.4916	14.5535	5.98889	6.10543	6.04716	2.94295	3.01314	2.97804
Subject_21	3050	2798	5848	14.8058	14.0603	14.4331	6.21394	6.47182	6.34288	2.9532	2.94344	2.94832
Subject_22	5463	4873	10336	17.7948	16.9791	17.3869	6.75543	6.9653	6.86037	3.09053	3.03365	3.06209
Subject_23	4080	4239	8319	16.9295	17.1619	17.0457	6.47627	6.47362	6.47494	3.17298	3.15204	3.16251
Subject_24	4539	4895	9434	14.2736	16.4815	15.3775	6.14814	5.99668	6.07241	3.11035	3.1429	3.12662
Subject_25	2527	2571	5098	10.6624	11.6335	11.148	5.64045	5.78403	5.71224	2.74032	2.78108	2.7607
Subject_26	5993	5920	11913	18.6698	19.4098	19.0398	7.15916	7.25821	7.20868	3.16653	3.23405	3.20029
Subject_27	4071	4190	8261	12.6429	12.4702	12.5565	5.92058	5.90489	5.91273	2.83452	2.9533	2.89391
Subject_28	2958	2528	5486	11.832	10.3607	11.0963	5.29714	5.57893	5.43803	2.86695	2.78662	2.82678
Subject_29	4074	3454	7528	17.6364	12.4693	15.0528	5.98175	6.94178	6.46176	3.3296	2.78816	3.05888

## Sheet: WMH count
Study ID, testing wave, WMH binary mask used		Frontal				Parietal				Temporal				Occipital				Basal ganglia
		Closely related to PVS		Not closely related to PVS		Closely related to PVS		Not closely related to PVS		Closely related to PVS		Not closely related to PVS		Closely related to PVS		Not closely related to PVS		Closely related to PVS		Not closely related to PVS
		BG	CSO	BG	CSO	BG	CSO	BG	CSO	BG	CSO	BG	CSO	BG	CSO	BG	CSO	BG	CSO	BG	CSO
Subject_1 - wave 1	Mask (1_WMH)		21		4		2		2										1
Subject_1 - wave 2	Mask (2_WMH)		27		3		3		3									1	1
Subject_1 - wave 3	Mask (3_WMH)		33		20		12		2				1					2
Subject_2 - wave 1	Mask (1_WMH)		24		8		7											3		1
Subject_2 - wave 2	Mask (2_WMH)		23		4		10											3		2
Subject_2 - wave 3	Mask (3_WMH)		47		17		13		1		3							6		2
Subject_3 - wave 1	Mask (1_WMH)				1
Subject_3 - wave 2	Mask (2_WMH)		7		2													1
Subject_3 - wave 3	Mask (3_WMH)		28		6		2											1		2
Subject_4 - wave 1	Mask (1_WMH)
Subject_4 - wave 2	Mask (2_WMH)						1
Subject_4 - wave 3	Mask (3_WMH)		2		2		3
Subject_5 - wave 1	Mask (1_WMH)		8				1				1							1
Subject_5 - wave 2	Mask (2_WMH)		10				1				1		1					1		1
Subject_5 - wave 3	Mask (3_WMH)		22		4		1		1		1						1	1		1
Subject_6 - wave 1	Mask (1_WMH)		11		6		6				1
Subject_6 - wave 2	Mask (2_WMH)		15		5		9				1									1
Subject_6 - wave 3	Mask (3_WMH)		28		6		10		2		4				1					1
Subject_7 - wave 1	Mask (1_WMH)		25		12		9		4		1		2					17		7
Subject_7 - wave 2	Mask (2_WMH)		26		18		9		6		3		2					18		7
Subject_7 - wave 3	Mask (3_WMH)		52		27		16		10		5		9				2	20		7
Subject_8 - wave 1	Mask (1_WMH)		4		4		3		2		1							3			1
Subject_8 - wave 2	Mask (2_WMH)		6		3		3		2		1							3			1
Subject_8 - wave 3	Mask (3_WMH)		10		8		6		3		4		3					4			1
Subject_9 - wave 1	Mask (1_WMH)		2
Subject_9 - wave 2	Mask (2_WMH)		2
Subject_9 - wave 3	Mask (3_WMH)		3				1										3
Subject_10 - wave 1	Mask (1_WMH)		14		4		8				2							3		3
Subject_10 - wave 2	Mask (2_WMH)		17		3		8				2							3		3
Subject_10 - wave 3	Mask (3_WMH)		28		13		9		1		3		2				1	7		4
Subject_11 - wave 1	Mask (1_WMH)		16	1	6		4		1		1	1	1					17		3
Subject_11 - wave 2	Mask (2_WMH)		15	3	6		5		3		2							14		2
Subject_11 - wave 3	Mask (3_WMH)		29	1	22		11		6	2	3		6				3	13		3
Subject_12 - wave 1	Mask (1_WMH)		19		5				1									2
Subject_12 - wave 2	Mask (2_WMH)		20		7		1		1									2
Subjecct_12 - wave 3	Mask (3_WMH)		37		20		3		4		4		3		1		1	9		2
Subject_13 - wave 1	Mask (1_WMH)		29		6		9		1		1							5
Subject_13 - wave 2	Mask (2_WMH)		30		5		10		2		1							5		3
Subject_13 - wave 3	Mask (3_WMH)		45		17		21		8		1		2					8		2
Subject_14 - wave 1	Mask (1_WMH)				2		4
Subject_14 - wave 2	Mask (2_WMH)		6		2		5											1		2
Subject_14 - wave 3	Mask (3_WMH)		19		7		5		1						1		2	2
Subject_15 - wave 1	Mask (1_WMH)		1				1											1
Subject_15 - wave 2	Mask (2_WMH)						1											2		1
Subject_15 - wave 3	Mask (3_WMH)		2				1											1
Subject_16 - wave 1	Mask (1_WMH)		30		13		13		4		4		1					3		1
Subject_16 - wave 2	Mask (2_WMH)		28		9		9		5		4		2					3		1
Subject_16 - wave 3	Mask (3_WMH)		52		23		11		9		9		8		2		1	4		4
Subject_17 - wave 1	Mask (1_WMH)		12		2		4											7		3
Subject_17 - wave 2	Mask (2_WMH)		13		2		4				1		1							1
Subject_17 - wave 3	Mask (3_WMH)		9				4						1
Subject_18 - wave 1	Mask (1_WMH)		22		5		5		7		1							4		4
Subject_18 - wave 2	Mask (2_WMH)		31		15		13		8		4		2		1		5	6
Subject_18 - wave 3	Mask (3_WMH)		36		16		12		9		6		3		2		8	3		4
Subject_19 - wave 1	Mask (1_WMH)		28		15		5				1							3		3
Subject_19 - wave 2	Mask (2_WMH)		32		16		15		3		1				1			2		2
Subject_19 - wave 3	Mask (3_WMH)		34		18		14		7		1				1			2		2
Subject_20 - wave 1	Mask (1_WMH)		5		1		2		1		1							2		4
Subject_20 - wave 2	Mask (2_WMH)		9				6		1		1		2					2		2
Subject_20 - wave 3	Mask (3_WMH)		8				5		1		1							3		1
Subject_21 - wave 1	Mask (1_WMH)
Subject_21 - wave 2	Mask (2_WMH)				1								2
Subject_21 - wave 3	Mask (3_WMH)		1				1						2
Subject_22 - wave 1	Mask (1_WMH)		40		14		1				9							11		1	1
Subject_22 - wave 2	Mask (2_WMH)		38		16		6		6		11							11		1	1
Subject_22 - wave 3	Mask (3_WMH)		46		20		7		3		11				1			10		7	1
Subject_23 - wave 1	Mask (1_WMH)		12		4		9		2						1			3
Subject_23 - wave 2	Mask (2_WMH)		19		7		10		1						1			4
Subject_23 - wave 3	Mask (3_WMH)		21		12		8		3				1		1			4		4	2
Subject_24 - wave 1	Mask (1_WMH)						5
Subject_24 - wave 2	Mask (2_WMH)						5
Subject_24 - wave 3	Mask (3_WMH)		1				8		1		1		1
Subject_25 - wave 1	Mask (1_WMH)
Subject_25 - wave 2	Mask (2_WMH)
Subject_25 - wave 3	Mask (3_WMH)						1
Subject_26 - wave 1	Mask (1_WMH)		17		1		6				1
Subject_26 - wave 2	Mask (2_WMH)		22				6		1		1		1
Subject_26 - wave 3	Mask (3_WMH)		26		5		10		1		1
Subject_27 - wave 1	Mask (1_WMH)						2
Subject_27 - wave 2	Mask (2_WMH)						2
Subject_27 - wave 3	Mask (3_WMH)						1													1
Subject_28 - wave 1	Mask (1_WMH)		1				1		1
Subject_28 - wave 2	Mask (2_WMH)		3				2
Subject_28 - wave 3	Mask (3_WMH)		4				2				1									1
Subject_29 - wave 1	Mask (1_WMH)		2		1		2													1
Subject_29 - wave 2	Mask (2_WMH)		2		1		2						1							1
Subject_29 - wave 3	Mask (3_WMH)		10		1		8		1		1									1

## Sheet: Change in WMH count
	Frontal								Parietal								Temporal								Occipital								Basal Ganglia
	Increases around PVS		Increases close to PVS		Increases not near PVS		No increase		Increases around PVS		Increases close to PVS		Increases not near PVS		No increase		Increases around PVS		Increases close to PVS		Increases not near PVS		No increase		Increases around PVS		Increases close to PVS		Increases not near PVS		No increase		Increases around PVS		Increases close to PVS		Increases not near PVS		No increase
	BG	CSO	BG	CSO	BG	CSO	BG	CSO	BG	CSO	BG	CSO	BG	CSO	BG	CSO	BG	CSO	BG	CSO	BG	CSO	BG	CSO	BG	CSO	BG	CSO	BG	CSO	BG	CSO	BG	CSO	BG	CSO	BG	CSO	BG	CSO
Subject_1 - wave 1to2		14				5		6		2				1		1																								1
Subject_1 - wave 2to3		25		1		2		3		3		1		1		1																	1	1
Subject_2 - wave 1to2		22		4		2		4		4						3																	1		2		1
Subject_2 - wave 2to3		16		5		3		3		8		2																					2				2		1
Subject_3 - wave 1to2						1
Subject_3 - wave 2to3		5				2		2																									1
Subject_4 - wave 1to2
Subject_4 - wave 2to3										1
Subject_5 - wave 1to2		6		1				1								1		1															1
Subject_5 - wave 2to3		10								1								1						1									1						1
Subject_6 - wave 1to2		10		2		4		1		5						1		1
Subject_6 - wave 2to3		12		1		5		2		7						2		1																			1
Subject_7 - wave 1to2		25		1		6		4		4				4		5		1				2											14		3		6		2
Subject_7 - wave 2to3		24		4		12		3		5		1		5		3		1				2		2									14		4		5		2
Subject_8 - wave 1to2		1				2		5		1				1		3								1									3				1
Subject_8 - wave 2to3		4				4		1		3				1		1		1															2				1		1
Subject_9 - wave 1to2								2
Subject_9 - wave 2to3		2
Subject_10 - wave 1to2		11		2		1		4		5		1				2		2															2		1		2		1
Subject_10 - wave 2to3		11		2				8		5		1				2		2															3				1		2
Subject_11 - wave 1to2		9		2		4	1	9		2		1		1		1		1					1	1									11		1				9
Subject_11 - wave 2to3		11	2	5	1	5		2		4		1		2				2															12		3				2
Subject_12 - wave 1to2		10		3		2		10								1																	2
Subject_12 - wave 2to3		15		4		6		2		1				1																			2
Subject_13 - wave 1to2		15		1		2		17		5		1		1		3				1													2		2				1
Subject_13 - wave 2to3		15		4		5		10		7				1		4		1															5				2		1
Subject_14 - wave 1to2						1		1		4
Subject_14 - wave 2to3		3		1				4		5						1																	1		1				1
Subject_15 - wave 1to2								1		1																							1
Subject_15 - wave 2to3										1																							1						2
Subject_16 - wave 1to2		21		2		6		15		10				2		5		2						3									2				1		1
Subject_16 - wave 2to3		22		4		8		4		8		3		2		1		4				2											3				1
Subject_17 - wave 1to2		5		1		2		6		4																													10
Subject_17 - wave 2to3		6						9		2		1				1								2															1
Subject_18 - wave 1to2		12				4		12		4		1		1		6		1															3				1		4
Subject_18 - wave 2to3		21				7		17		8		2		5		8		3		1				2		1				2		3	2		1				3
Subject_19 - wave 1to2		17		4		10		13		5								1															2				2		2
Subject_19 - wave 2to3		20		2		9		17		9		3		2		3		1								1							1						3
Subject_20 - wave 1to2		5						1		2						1				1													1				2		3
Subject_20 - wave 2to3		5						4		3		1				3								3									2						2
Subject_21 - wave 1to2
Subject_21 - wave 2to3				1												2
Subject_22 - wave 1to2		27		7		8		12				1				3		6		2				1									7		2			1	3
Subject_22 - wave 2to3		30		7		9		8		7				1		4		11															4		3		2		3	1
Subject_23 - wave 1to2		7		2		1		6		7						4										1													3
Subject_23 - wave 2to3		9				2		15		6		1		1		3										1							2						2
Subject_24 - wave 1to2										3		1				1
Subject_24 - wave 2to3										5
Subject_25 - wave 1to2
Subject_25 - wave 2to3
Subject_26 - wave 1to2		8		1				8		4		1				1		1
Subject_26 - wave 2to3		14						8		6				1				1						1
Subject_27 - wave 1to2												1				1
Subject_27 - wave 2to3										1						1
Subject_28 - wave 1to2		1								1				1
Subject_28 - wave 2to3		2						1		2
Subject_29 - wave 1to2		1				1		1		1						1																					1
Subject_29 - wave 2to3		1		1				1		2														1													1

## Sheet: Demographic, radiol and VRF
Study_ID	age_days	age_years	gender	diabetes	hibp	hichol	cvd_hist	Fazekas_deep	Fazekas_peri	atrophy_deep	atrophy_superficial
Subject_1	25985	71.1431	2	0	0	0	0	1	1	4	4
Subject_2	26181	71.6797	1	0	0	0	0	1	2	2	2
Subject_3	25964	71.0856	1	0	0	0	0	1	1	5	4
Subject_4	26239	71.8385	1	0	0	1	0	0	1	4	4
Subject_5	26131	71.5428	2	0	1	0	0	1	1	3	3
Subject_6	26195	71.718	1	0	1	0	1	1	2	5	6
Subject_7	26256	71.885	2	0	0	0	0	2	1	1	1
Subject_8	26101	71.4606	1	0	1	0	0	1	2	3	6
Subject_9	26023	71.2471	1	0	1	1	1	0	1	5	5
Subject_10	26146	71.5838	1	0	1	1	1	1	1	1	3
Subject_11	26303	72.0137	2	0	1	0	0	2	2	2	2
Subject_12	26188	71.6988	1	0	1	0	0	1	1	4	4
Subject_13	26110	71.4853	1	0	1	1	0	1	1	4	4
Subject_14	26189	71.7016	1	0	0	0	1	1	2	6	5
Subject_15	26343	72.1232	1	1	0	0	0	1	1	5	5
Subject_16	26314	72.0438	2	0	1	0	0	3	2	5	5
Subject_17	26251	71.8713	1	0	0	0	1	1	2	3	3
Subject_18	26323	72.0684	2	0	1	1	1	1	1	4	4
Subject_19	26396	72.2683	1	0	1	1	0	1	1	4	4
Subject_20	26612	72.8597	2	0	1	1	0	1	1	1	1
Subject_21	26259	71.8932	2	0	0	0	0	0	1	1	1
Subject_22	26276	71.9398	1	0	0	0	0	1	2	3	2
Subject_23	26505	72.5667	2	0	0	0	0	1	2	3	3
Subject_24	26386	72.2409	1	0	0	0	0	0	1	3	3
Subject_25	26232	71.8193	2	0	1	0	0	0	1	1	1
Subject_26	26288	71.9726	2	0	1	1	1	1	2	2	2
Subject_27	26291	71.9808	1	0	0	1	1	0	1	5	5
Subject_28	26414	72.3176	1	0	0	0	0	1	1	6	5
Subject_29	26370	72.1971	2	0	0	0	1	0	1	3	3
median								1	1	3	4
QR1								1	1	2	2
QR3								1	2	5	5

## Sheet: Data Dictionary
Variable name / acronym
Study_ID	ID given to this study's participant's data
CSO	centrum semiovale
BG	basal ganglia region, which include caudate, putamen, globus pallidus, thalamus and internal and external capsules
RCSO_PVS_CC_vol	total volume of the PVS binary mask in the centrum semiovale right hemisphere
LCSO_PVS_CC_vol	total volume of the PVS binary mask in the centrum semiovale left hemisphere
CSO_PVS_CC_vol	total volume of the PVS binary mask in the centrum semiovale (both hemispheres)
PVS_RCSO_sizeMean	mean size of the individual PVS in the centrum semiovale right hemisphere
PVS_LCSO_sizeMean	mean size of the individual PVS in the centrum semiovale left hemisphere
PVS_CSO_sizeMean	mean size of the individual PVS in the centrum semiovale (both hemispheres)
PVS_LCSO_lengthMean	mean length of the individual PVS in the centrum semiovale left hemisphere
PVS_RCSO_lengthMean	mean length of the individual PVS in the centrum semiovale right hemisphere
PVS_CSO_lengthMean	mean length of the individual PVS in the centrum semiovale (both hemispheres)
PVS_RCSO_widthMean	mean width of the individual PVS in the centrum semiovale right hemisphere
PVS_LCSO_widthMean	mean width of the individual PVS in the centrum semiovale left hemisphere
PVS_CSO_widthMean	mean width of the individual PVS in the centrum semiovale (both hemispheres)
age_days	study participant's age in days at the time of the first MRI scan
age_years	study participant's age in years at the time of the first MRI scan
gender	study participant's biological sex at birth
diabetes	study participant's self-reported diabetes status (1-yes/0-no)
hibp	study participant's self-reported hypertension status (1-hypertensive/0-normotensive)
hichol	study participant's self-reported hypercholesterolaemia status (1-yes/0-no)
cvd_hist	study participant's self-reported history of cardiovascular disease (1-yes/0-no)
Fazekas_deep	Neuroradiological (visual) Fazekas scores for the deep white matter
Fazekas_peri	Neuroradiological (visual) Fazekas scores for the periventricular white matter
atrophy_deep	Neuroradiological (visual) atrophy scores considering degree of brain ventricular enlargement with respect to that from a normal age-relevant scan
atrophy_superficial	Neuroradiological (visual) cortical and superficial atrophy scores
